# Supplementary material
Source: publisher figshare collection journal article supplement (https://tandf.figshare.com/ndownloader/files/13643351)
Supplement: Supplementary file 1 [file 13643351]

## Supporting Material

### Degradation of HV cathodes for advanced lithium ion batteries – differential capacity study on differently balanced cells

Philipp Jehnichen, Klaus Wedlich, Carsten Korte\*

Forschungszentrum Jülich GmbH, Institute for Energy and Climate Research, IEK-3:  
Electrochemical Process Engineering, 52425 Jülich, Germany

\* Carsten Korte, c.korte@fz-juelich.de

#### Raman spectra of ordered $\text{LiNi}_{0.5}\text{Mn}_{1.5}\text{O}_4$

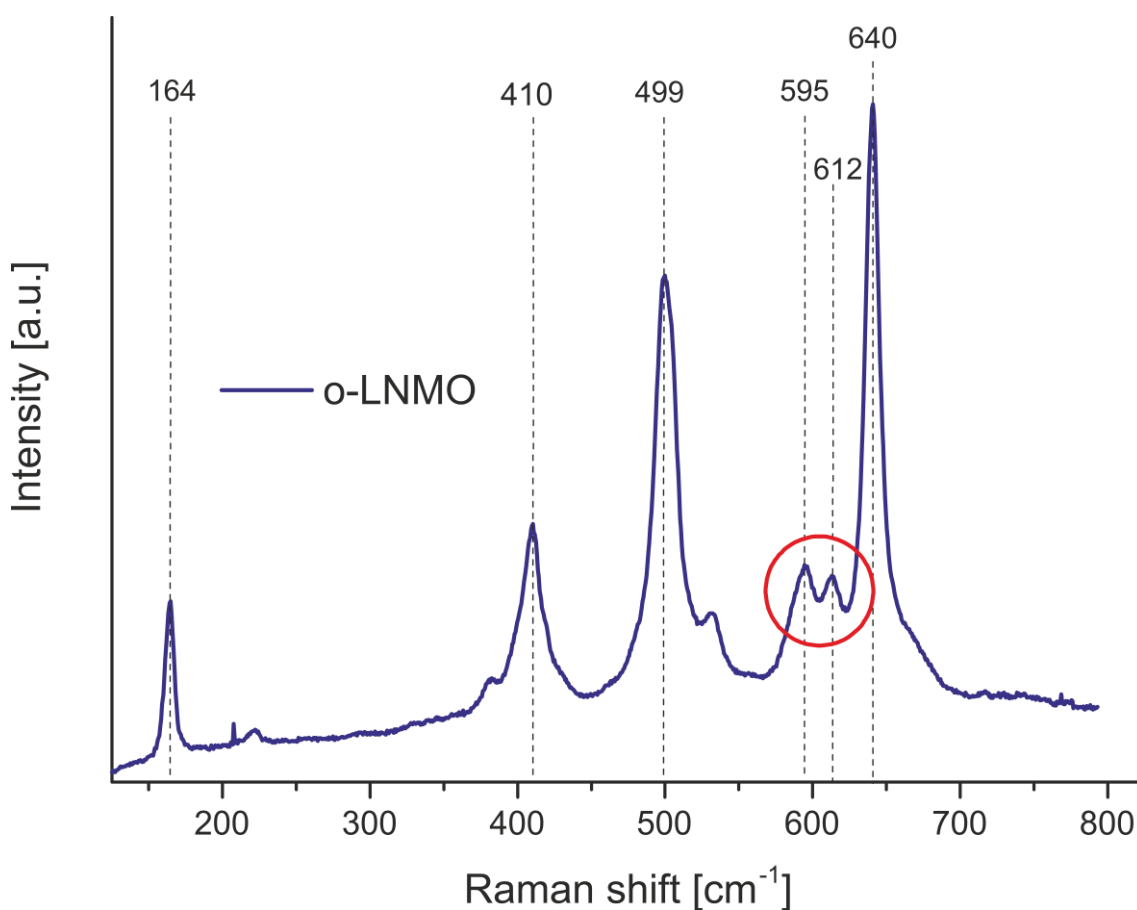

Figure S1. Raman spectra at an excitation wavelength  $\lambda$  of 785 nm (Laser from Oxxius, 13.5 mW) of ordered  $\text{LiNi}_{0.5}\text{Mn}_{1.5}\text{O}_4$ . The scattered light was gathered by a high aperture microscope objective and analysed with a Shamrock detector (800 l/mm grating, 80  $\mu\text{m}$  slit and 55 s accumulation time) and Andor Solis software.

Figure S1 shows the Raman spectra of ordered  $\text{LiNi}_{0.5}\text{Mn}_{1.5}\text{O}_4$  at an excitation wavelength  $\lambda$  of 785 nm. The red circle shows two local maxima (595 and 612  $\text{cm}^{-1}$ ), which are typical for ordered  $\text{LiNi}_{0.5}\text{Mn}_{1.5}\text{O}_4$ . Disordered  $\text{LiNi}_{0.5}\text{Mn}_{1.5}\text{O}_4$  has at this Raman shift a plateau, which is not separated in two peaks. [1]

## Reference

- [1] Samarasingha, P. B.; Andersen, N. H.; Sørby, M. H.; Kumar, S.; Nilsen, O.; Fjellvåg, H., Neutron diffraction and Raman analysis of  $\text{LiMn}_{1.5}\text{Ni}_{0.5}\text{O}_4$  spinel type oxides for use as lithium ion battery cathode and their capacity enhancements. *Solid State Ionics* 2016, 284, 28-36.
